# Supplementary material for: Synergistic effect of phosphorus–nitrogen and silicon-containing chain extenders on the mechanical properties, flame retardancy and thermal degradation behavior of waterborne polyurethane
Source: Royal Society of Chemistry journal article supplement (doi:10.1039/c6ra15869b), 2016-01-01
Supplement: c6ra15869b1.pdf [file c6ra15869b1.pdf]

**Supporting Information for:**

**Synergistic effect of phosphorus-nitrogen and silicon-containing chain extenders on the mechanical property, flame retardancy and thermal degradation behavior of waterborne polyurethane**

Peikun Zhang,<sup>a</sup> Haojun Fan,<sup>\*a</sup> Saiqi Tian,<sup>a</sup> Yi Chen<sup>b</sup> and Jun Yan<sup>b</sup>

<sup>a</sup> Key Laboratory of Leather Chemistry and Engineering (Sichuan University), Ministry of Education, Chengdu 610065, P. R. China

<sup>b</sup> National Engineering Laboratory for Clean Technology of Leather Manufacture, Sichuan University, Chengdu 610065, P. R. China

\* Correspondence to: Haojun Fan (E-mail: fanhaojun@163.com)

**Table S1.** Composition and LOI values of FRWPU post-chain extended by KH-602.

| Sample <sup>a</sup> | Theoretical composition (g) |         |      |     |      |                  |        | LOI (%)    |
|---------------------|-----------------------------|---------|------|-----|------|------------------|--------|------------|
|                     | H <sub>12</sub> MDI         | PPG2000 | DMPA | NPG | TEA  | H <sub>2</sub> O | KH-602 |            |
| WPU                 | 23                          | 30      | 2.9  | 3.0 | 2.19 | 110              | 0      | 18.4 ± 0.2 |
| FRWPU-0.3           | 23                          | 30      | 2.9  | 3.0 | 2.19 | 110              | 1.38   | 18.5 ± 0.1 |
| FRWPU-0.6           | 23                          | 30      | 2.9  | 3.0 | 2.19 | 110              | 2.76   | 18.6 ± 0.2 |

<sup>a</sup> The post-chain extension ratios of KH-602 for FRWPU were 30% and 60%, respectively.

In Table S1, it can be seen that WPU has a LOI value of 18.4%, showing a poor flame retardancy. After post-chain extended by KH-602, the LOI values of FRWPU insignificantly improve to 18.5% and 18.6%, respectively, which are still very combustible, suggesting that the low concentration of silicon element cannot effectively bestow polyurethane with flame retardant effect.
